# Supplementary material for: Sarcoma of the breast: breast cancer history as etiologic and prognostic factor—A population-based case–control study
Source: Springer Nature journal article supplement (doi:10.1007/s10549-020-05802-3), 2020-07-21
Supplement: MOESM1 [file 18202544]

| Age | Time since BC | Side   | Surgery for BC                           | Histo BC                                                       | Chemo | Hormone therapy | RT (Gy)               | Surgery for AS      | Histo AS                        | Misc                                                                                                |
|-----|---------------|--------|------------------------------------------|----------------------------------------------------------------|-------|-----------------|-----------------------|---------------------|---------------------------------|-----------------------------------------------------------------------------------------------------|
| 80  | 10            | ipsi   | partial ME+ axillary nodes               | 9 mm ductal carcinoma. ER+, PR+, no LN met                     | none  | Tamoxifene      | 42                    | ME                  | 37 mm AS Ki-67 80%              | MRM contralat 9 years previous, DCIS                                                                |
| 84  | 7             | ipsi   | partial ME+SNB                           | 17mm ductal carcinoma. Elston I. ER+, PR+, Her2-, SNB no met   | none  | Tamoxifene      | 45.22                 | ME +LD              | 22 mm mutlifocal AS. Grade II   | Subcutaneous metastases 2 years post surgery for AS                                                 |
| 85  | 9             | ipsi   | partial ME+SNB                           | 10 and 14 mm lobular carcinoma. Elston II. ER+, PR+, Ki-67 12% | none  | Arimidex        | 50                    | ME + axillary nodes | 60 mm AS. No LN met.            |                                                                                                     |
| 69  | 17            | contra | partial ME, completed MRM axillary nodes | 40 mm poorly diff lobular carcinoma and LCIS. Met in 1/6 LN    | none  | Anastrozol      | 46                    | ME + axillary nodes | 40 mm AS. Grade III. No LN met. |                                                                                                     |
| 77  | 5             | ipsi   | partial ME+SNB                           | 10 mm ductal carcinoma. Elston II. ER+, PR+ , SNB - (0/5 LN)   | none  | Tamoxifene      | 42 ipsi, 42.56 contra | ME+LD               | 20 mm AS. Grade II              | 3 years after first cancer contralateral ductal carcinoma 10 mm. Partial ME +SNB, no met, postop RT |

*Supplementary table, Data on previous breast carcinoma for a subset of angiosarcoma patients*
